# Supplementary material for: Evaluation of Rapid Library Preparation Protocols for Whole Genome Sequencing Based Outbreak Investigation
Source: PubMed Central journal article supplement (PMC6719548; doi:10.3389/fpubh.2019.00241), 2019-08-27

**Figure S4. Comparison of Ridom SeqSphere+ generated cgMLST minimum spanning trees (MSTs) by library kit and coverage.** Isolates are colored for orientation. Reference isolate KCTC2190 is shown in dark blue. Minimum distances between isolates is shown with lines, and the number of allele differences is superimposed on the lines. This is not shown to scale. Complexes ( $\leq 20$  allele differences as defined in Ridom SeqSphere+) are highlighted in grey. The resolution between the isolates and the precise configuration of the MST changes across kits, especially at lower coverage, but the definition of the complex remains constant.

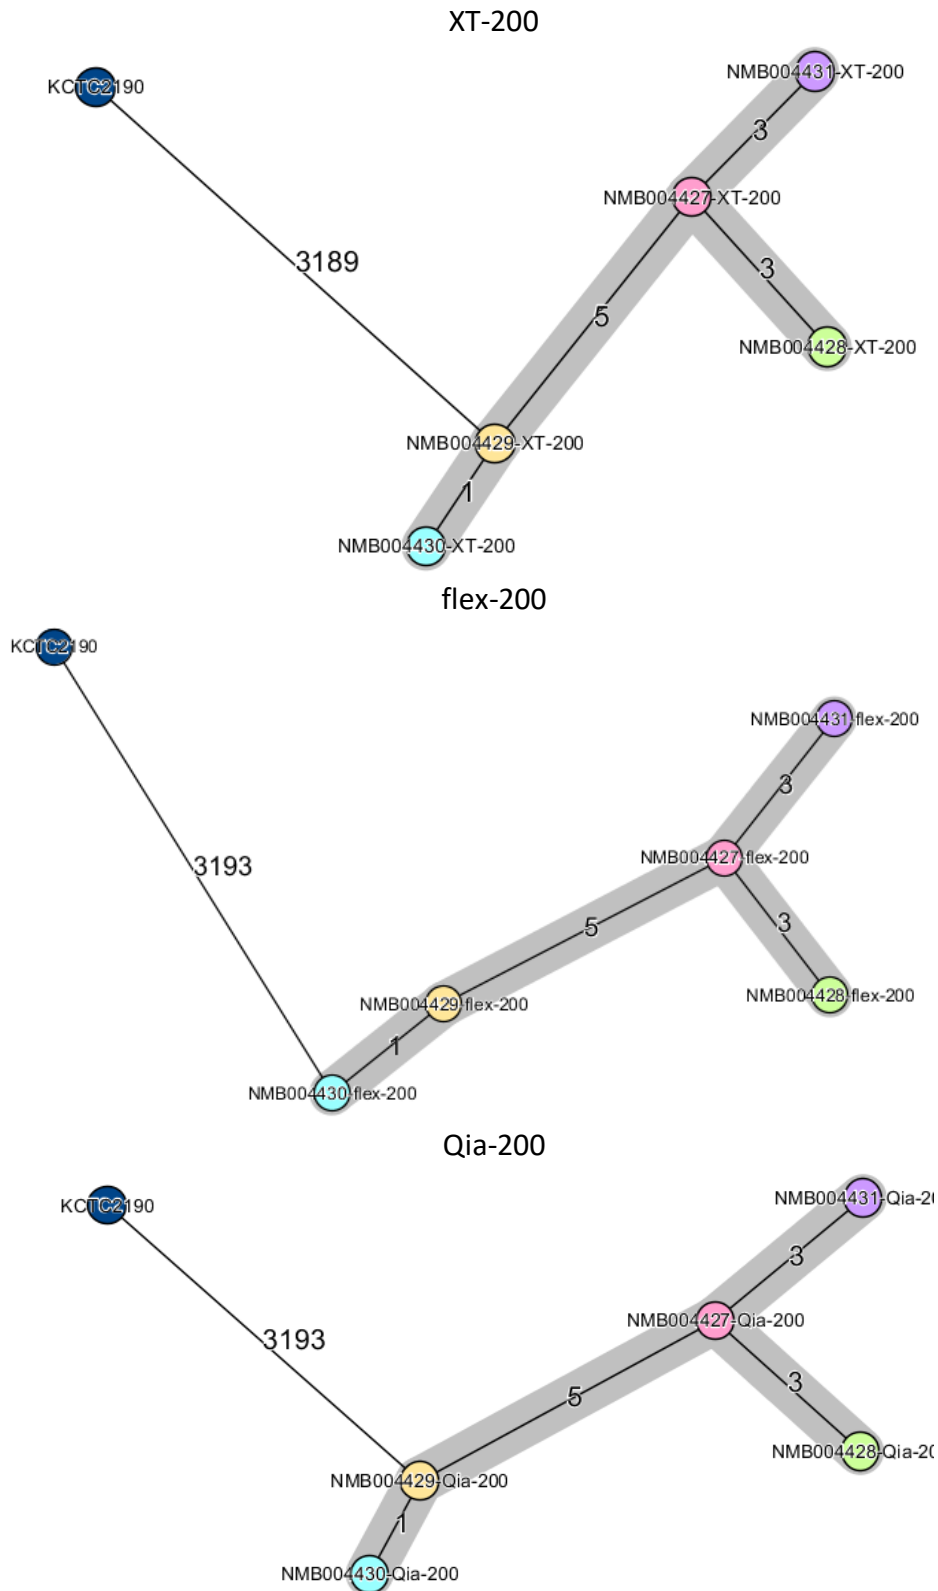

### XT-100

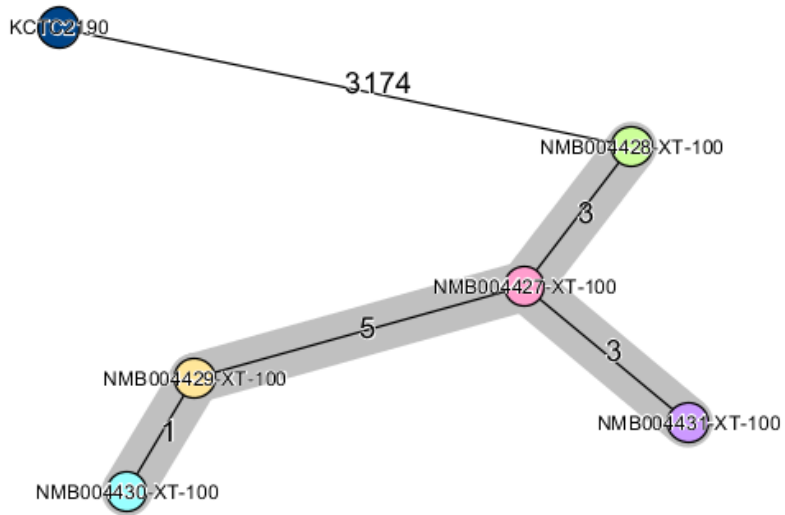

### flex-100

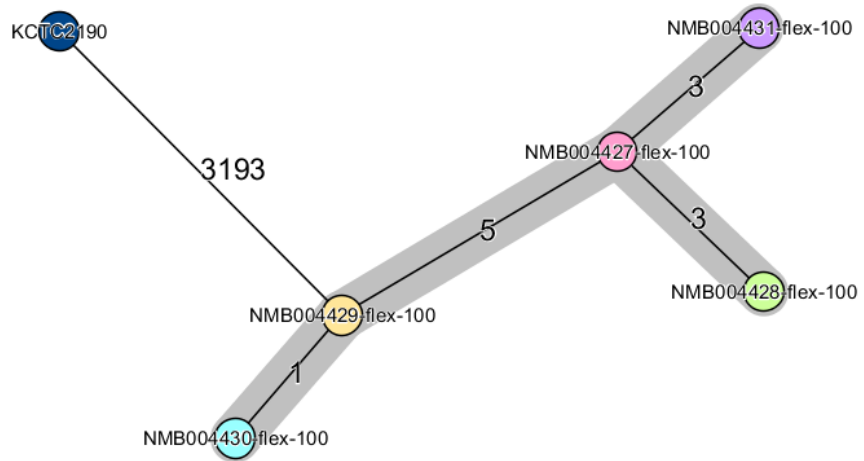

### Qia-100

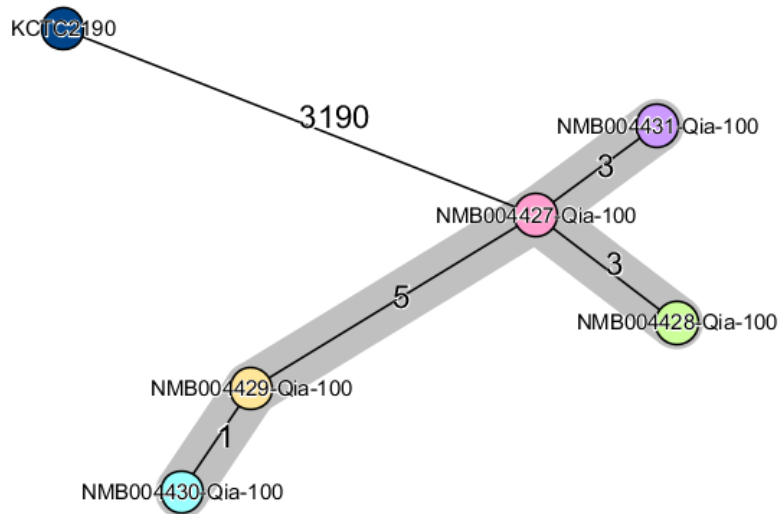

### XT-50

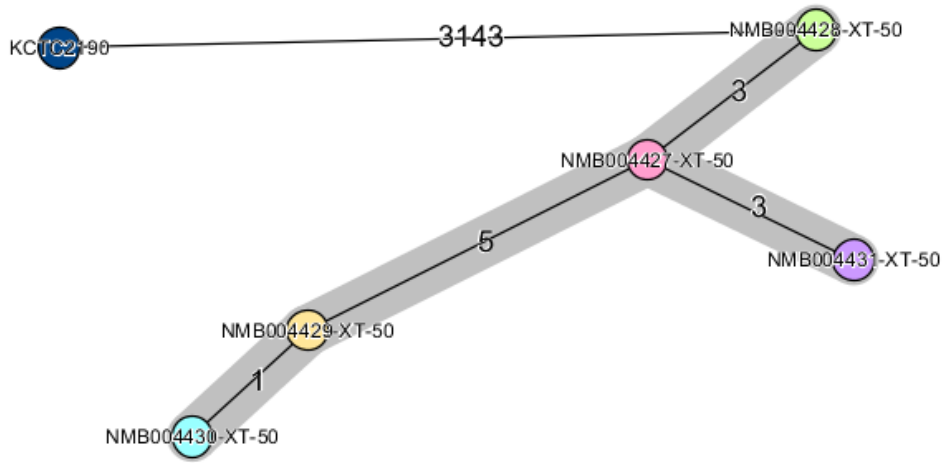

### flex-50

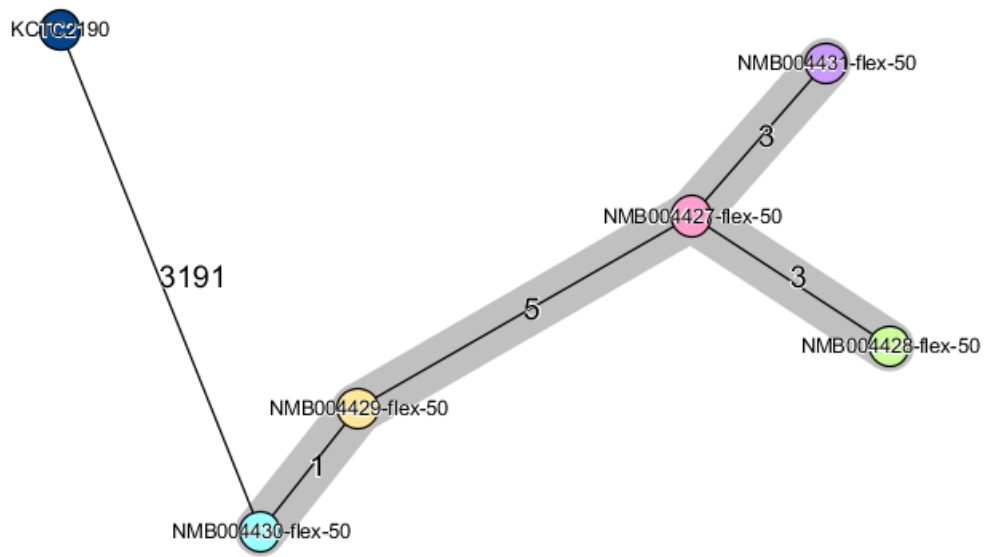

### Qia-50

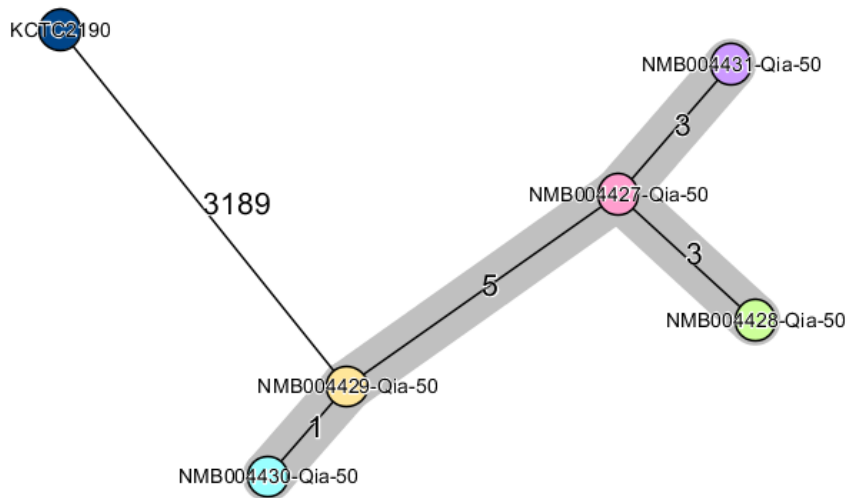

### XT-20

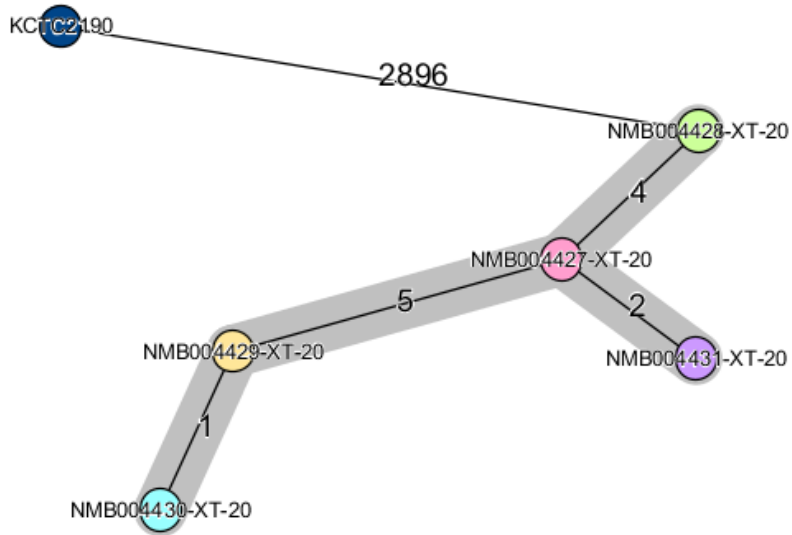

### flex-20

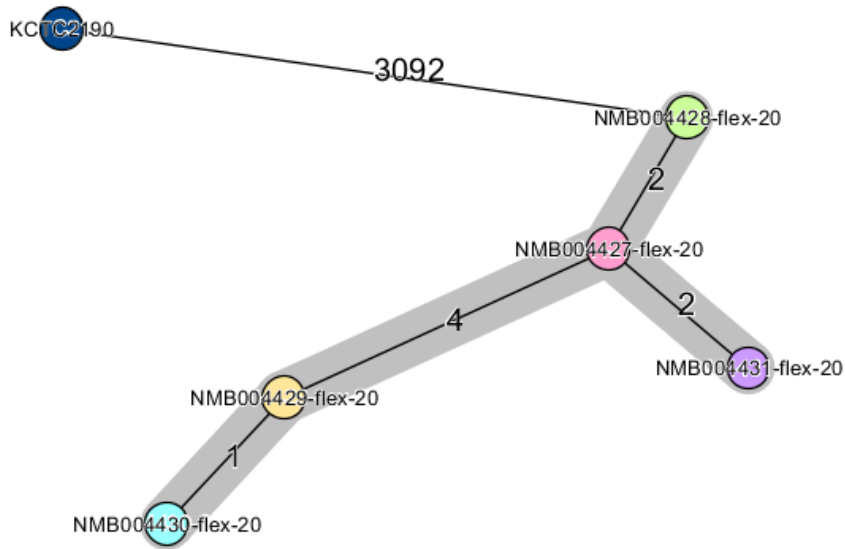

### Qia-20

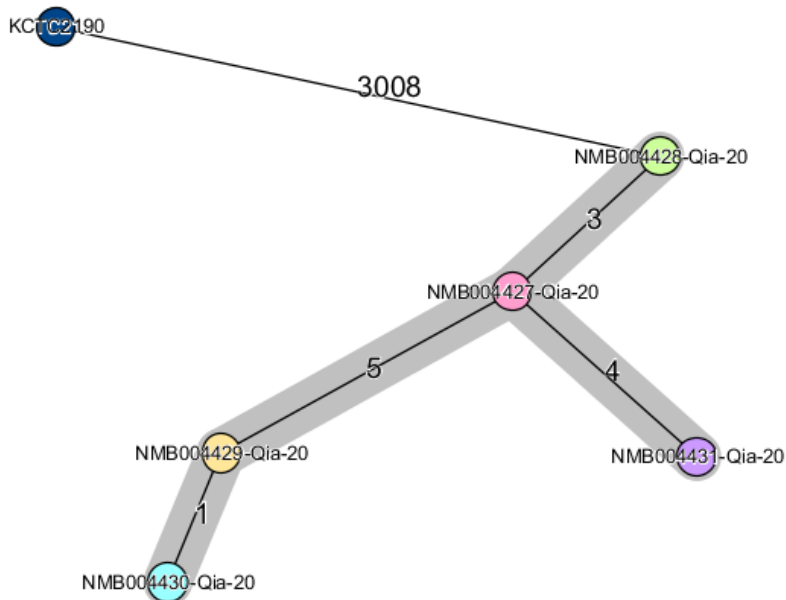

XT-10

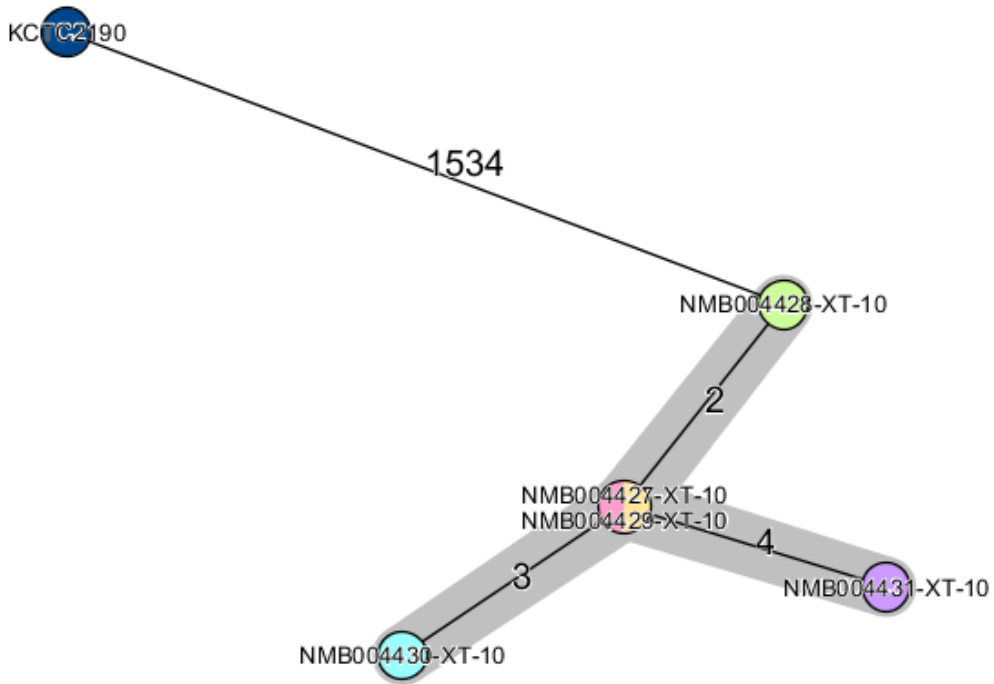

flex-10

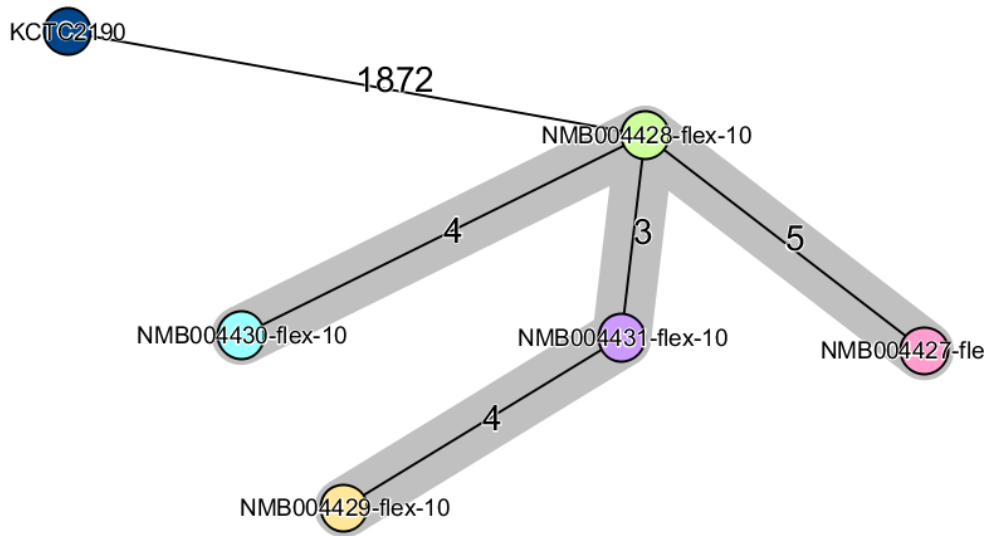

Qia-10

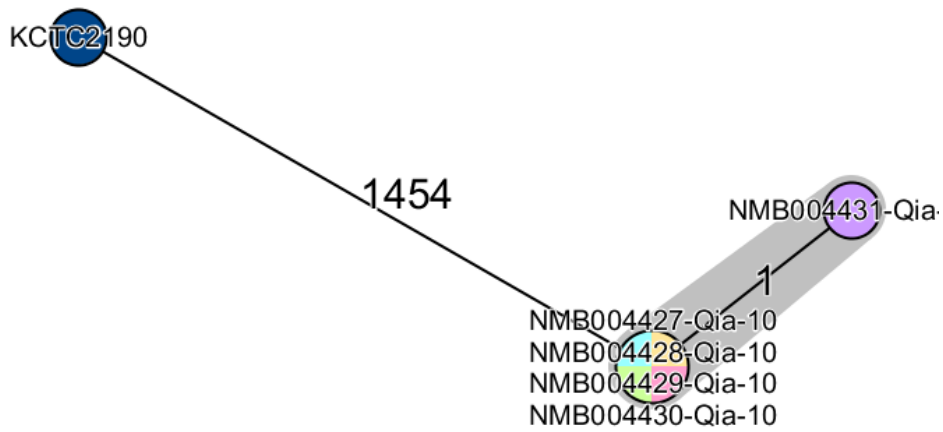

Supplement: Image_4.pdf [file Image_4.pdf]
